# Supplementary material for: A mesoporous silica-based probe with a molecularly imprinted polymer recognition and Mn:ZnS QDs@rhodamine B ratiometric fluorescence sensing strategy for the analysis of 4-nitrophenol
Source: Royal Society of Chemistry journal article supplement (doi:10.1039/d2ay01147f), 2022-01-01
Supplement: d2ay01147f1.pdf [file d2ay01147f1.pdf]

**A mesoporous silica-based molecularly imprinted polymers recognition and  
Mn:ZnS QDs@rhodamine B ratiometric fluorescence sensing strategy for  
analysis 4-nitrophenol**

Jiao Luo,<sup>a,1</sup> Hongyan Tan,<sup>a,1</sup> Bin Yang,<sup>a</sup> Donghua Chen,<sup>\*a</sup> Junjie Fei<sup>\*a</sup>

<sup>a</sup> Key Laboratory of Environmentally Friendly Chemistry and Applications of Ministry of Education,  
College of Chemistry, Xiangtan University, Xiangtan 411105, Hunan, China

<sup>1</sup> Author Contributions: these authors contributed equally

\* Corresponding author: Tel: (+86)0731-58292253; Fax: (+86)0731-58292253;

Email: donghuachen@xtu.edu.cn; fei\_junjie@xtu.edu.cn

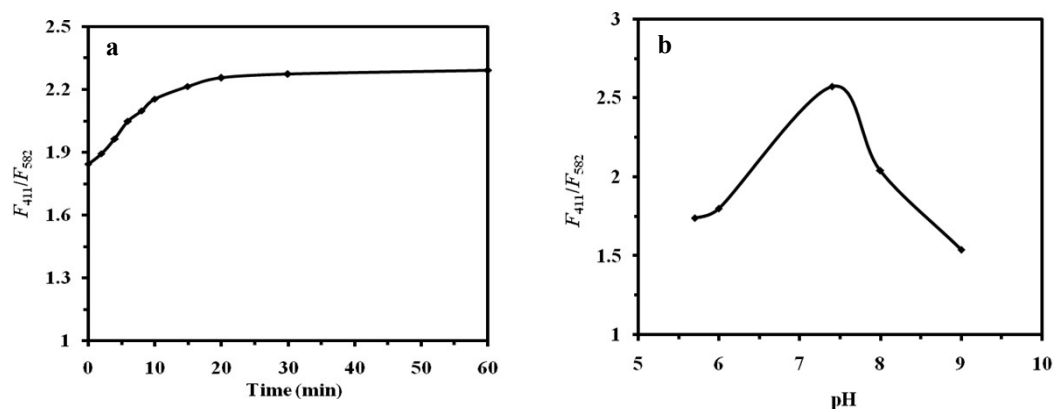

**Fig. S1.** Optimization of conditions for the detection of 4-NP with MIPs-coated Mn:ZnS QDs and RB co-doped MSN. The fluorescence intensity ratio between 411 nm and 582 nm at different time (a) and pH (b) after the addition of 4-NP.
